# Supplementary material for: Technical Note: Inexpensive modification of Exetainers for the reliable storage of trace-level hydrogen and carbon monoxide gas samples
Source: Copernicus journal article supplement (doi:10.5194/bg-2020-282), 2020-09-21
Supplement: Supplementary file 2 [file bg-2020-282-supplement.pdf]

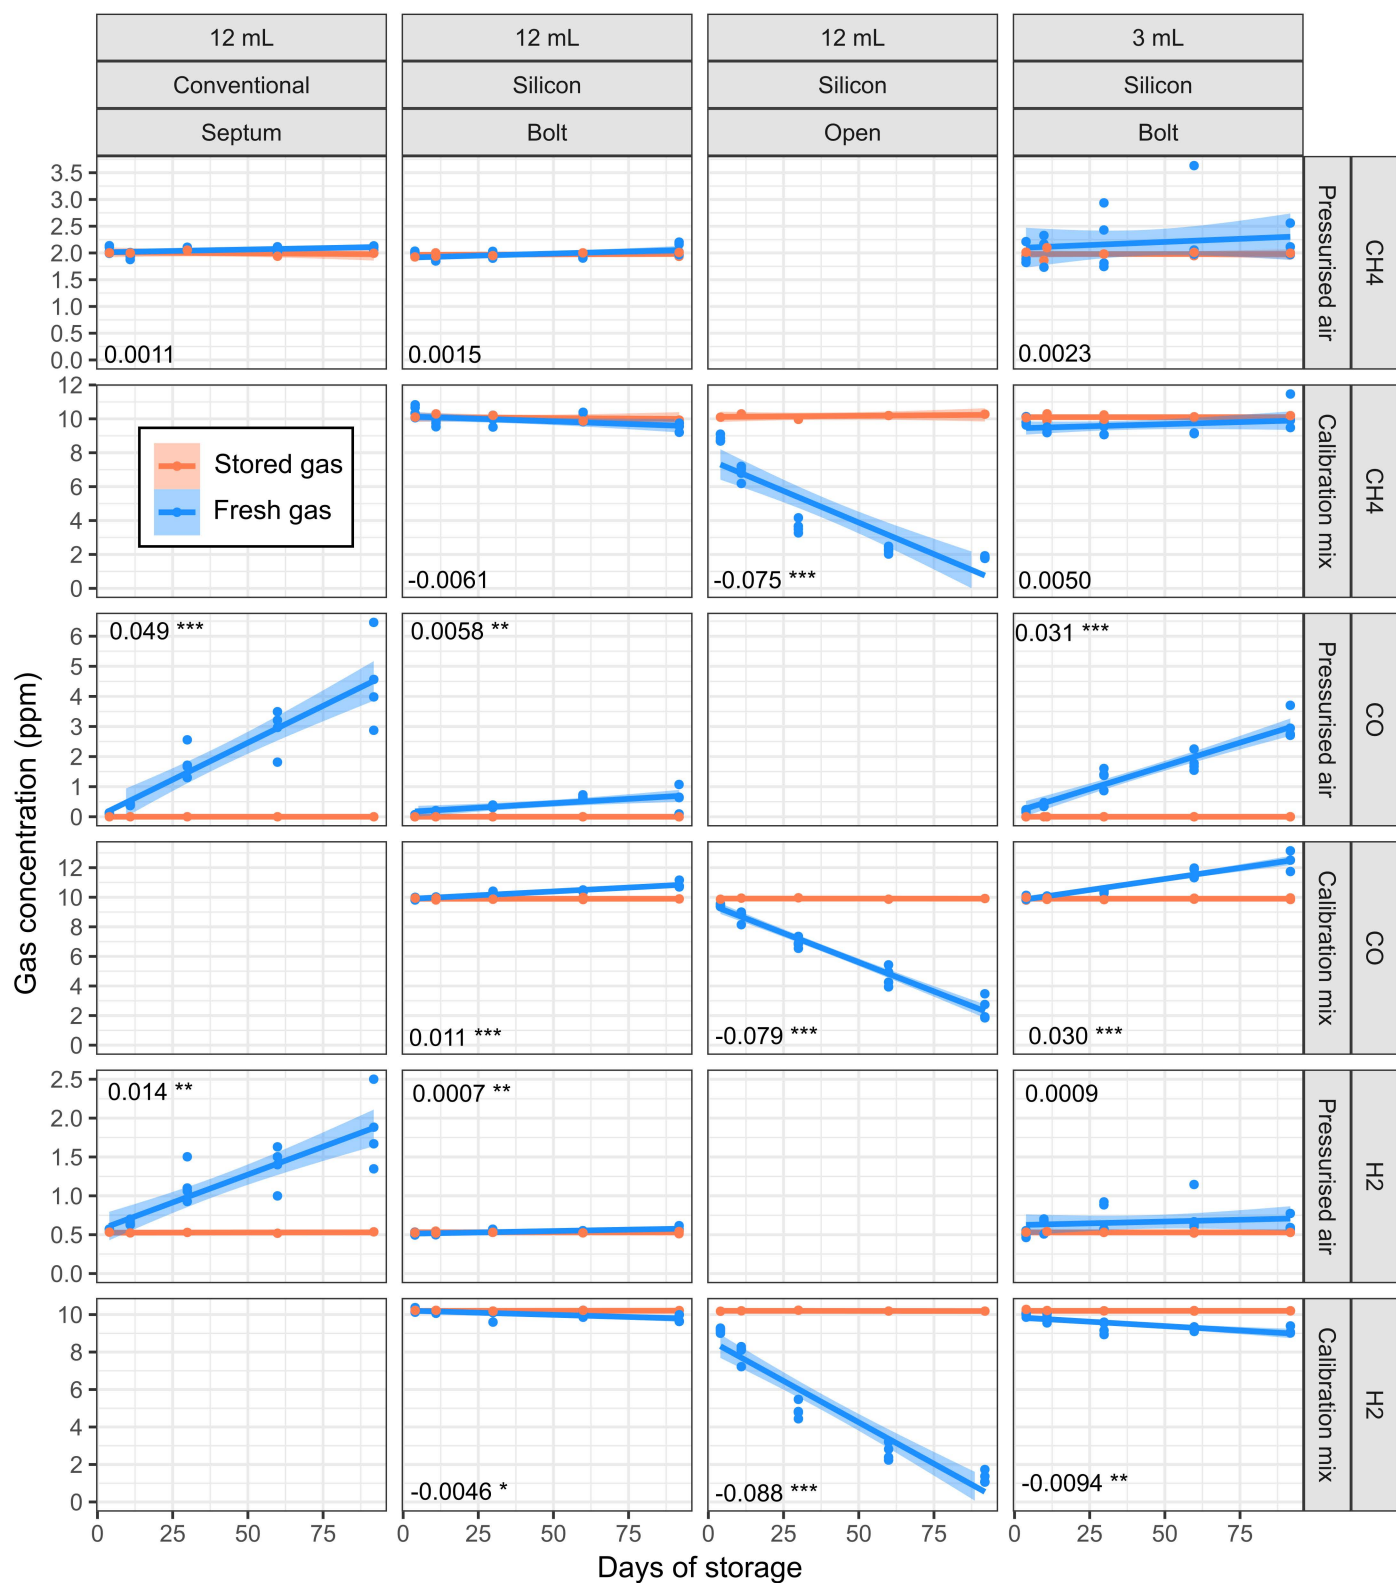

Fig. S1: Concentrations of stored gas samples and freshly prepared reference gas samples. The number listed is the slope of the stored gas concentrations calculated using linear regression with interactions; any significant difference to fresh gas is indicated with stars: \*\*\*  $p < 0.001$ ; \*\*  $p < 0.01$ ; \*  $p < 0.05$
